# Supplementary material for: Acid-catalyzed hydrolysis kinetics of organic hydroperoxides: computational strategy and structure–activity relationship
Source: Copernicus journal article supplement (doi:10.5194/acp-25-12615-2025), 2025-10-10
Supplement: Supplementary file 1 [file acp-25-12615-2025-supplement.pdf]

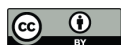

*Supplement of*

## **Acid-catalyzed hydrolysis kinetics of organic hydroperoxides: computational strategy and structure–activity relationship**

**Qiaojing Zhao et al.**

*Correspondence to:* Rujing Yin (yinrj@dlut.edu.cn) and Hong-Bin Xie (hbxie@dlut.edu.cn)

The copyright of individual parts of the supplement might differ from the article licence.

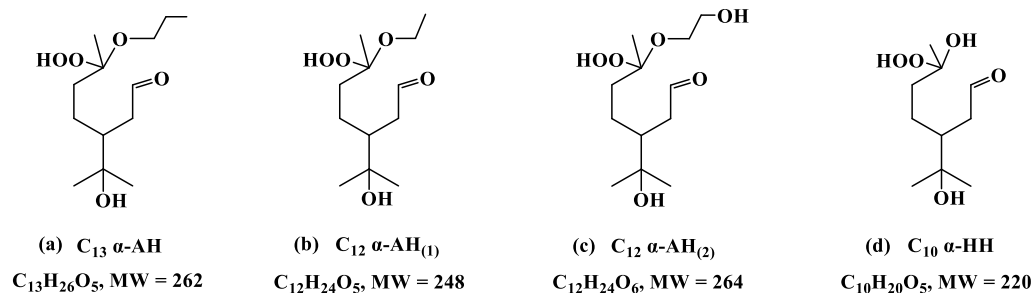

**Figure S1.** Structures of selected four ROOHs for screening protonated water cluster model (Qiu et al., 2020; Enami, 2022; Hu et al., 2022). Structure (a) is  $C_{13}$   $\alpha$ -AH derived via  $\alpha$ -terpineol derived CIs and 1-propanol, (b) is  $C_{12}$   $\alpha$ -AH<sub>(1)</sub> derived via  $\alpha$ -terpineol derived CIs and ethanol, (c) is  $C_{12}$   $\alpha$ -AH<sub>(2)</sub> derived via  $\alpha$ -terpineol derived CIs and ethylene glycol, and (d) is  $C_{10}$   $\alpha$ -HH derived via  $\alpha$ -terpineol derived CIs and water. The corresponding chemical formulas and molecular weights (MW, amu) are labelled.

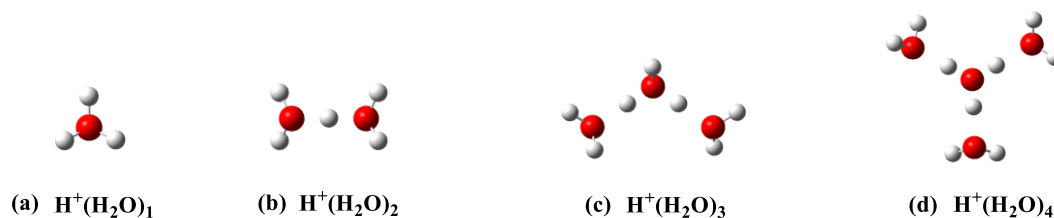

**Figure S2.** Minimum-energy structures of protonated water cluster (a)  $H^+(H_2O)_1$ , (b)  $H^+(H_2O)_2$ , (c)  $H^+(H_2O)_3$ , (d)  $H^+(H_2O)_4$ . The atoms in red and white represent oxygen and hydrogen atoms, respectively.

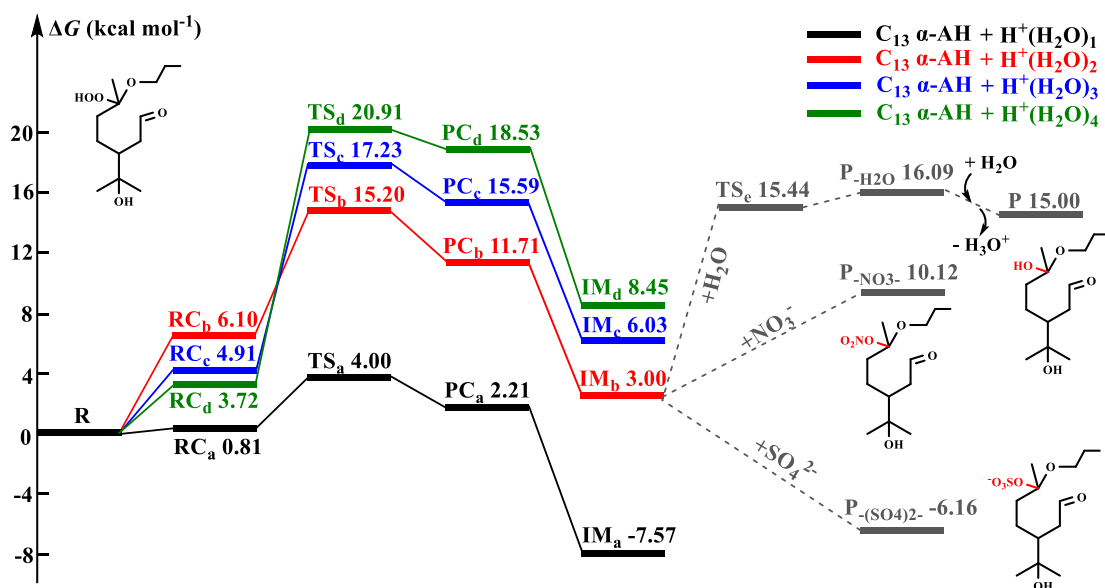

**Figure S3.** Calculated free-energy surfaces for acid-catalyzed hydrolysis of  $C_{13} \alpha\text{-AH}$  in four different cases at the SMD/M06-2X/6-311++G(3df,2pd)//M06-2X/6-31+G(d,p) level. The free energies of ROOH and  $H^+(H_2O)_n$  ( $n = 1, 2, 3, 4$ ) are set to zero (reference state, R). RC,  $TS_x$  ( $x = a, b, c, d, e$ ), PC, IM and P represent pre-reactive complexes, transition states, post-reactive complexes, intermediates and products, respectively.

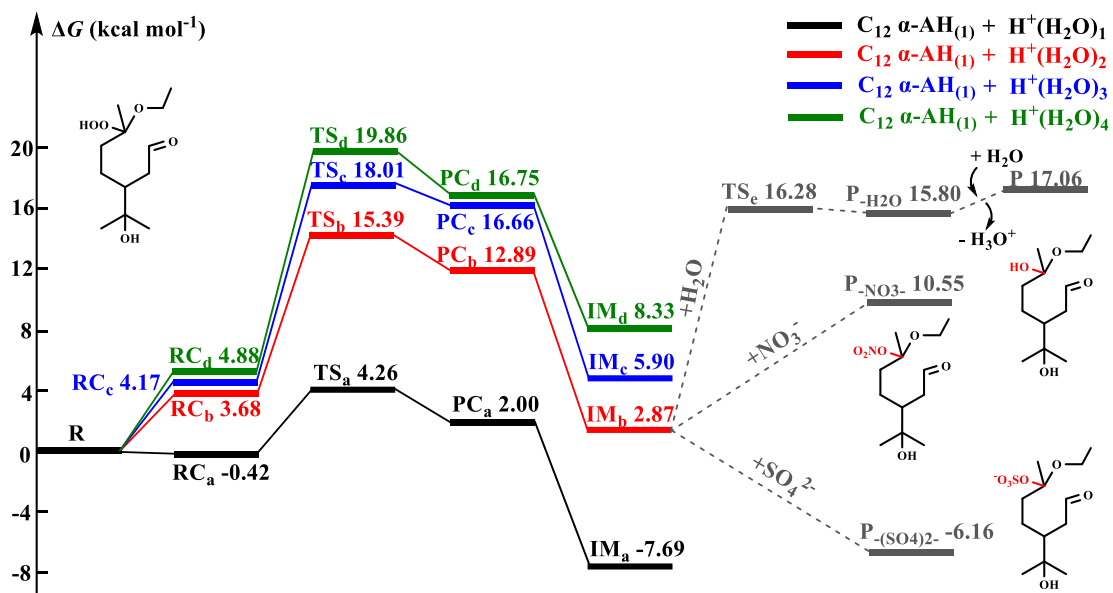

**Figure S4.** Calculated free-energy surfaces for acid-catalyzed hydrolysis of  $C_{12}$   $\alpha$ -AH<sub>(1)</sub> in four different cases at the SMD/M06-2X/6-311++G(3df,2pd)//M06-2X/6-31+G(d,p) level. The free energies of ROOH and  $H^+(H_2O)_n$  ( $n = 1, 2, 3, 4$ ) are set to zero (reference state, R). RC, TS<sub>x</sub> ( $x = a, b, c, d, e$ ), PC, IM and P represent pre-reactive complexes, transition states, post-reactive complexes, intermediates and products, respectively.

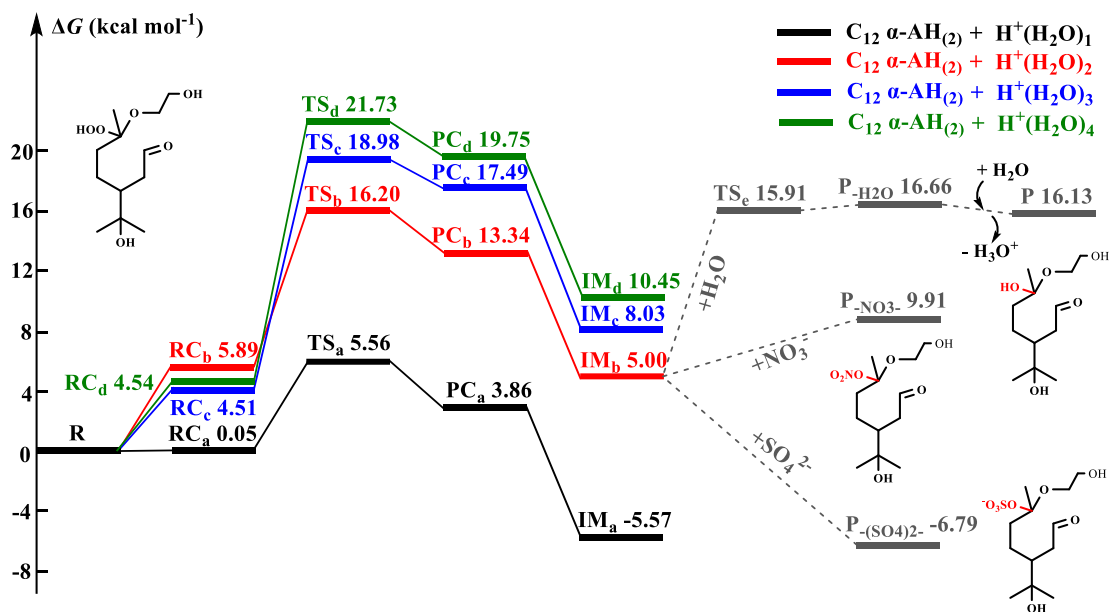

**Figure S5.** Calculated free-energy surfaces for acid-catalyzed hydrolysis of  $C_{12}$   $\alpha$ -AH<sub>(2)</sub> in four different cases at the SMD/M06-2X/6-311++G(3df,2pd)//M06-2X/6-31+G(d,p) level. The free energies of ROOH and  $H^+(H_2O)_n$  ( $n = 1, 2, 3, 4$ ) are set to zero (reference state, R). RC, TS<sub>*x*</sub> ( $x = a, b, c, d, e$ ), PC, IM and P represent pre-reactive complexes, transition states, post-reactive complexes, intermediates and products, respectively.

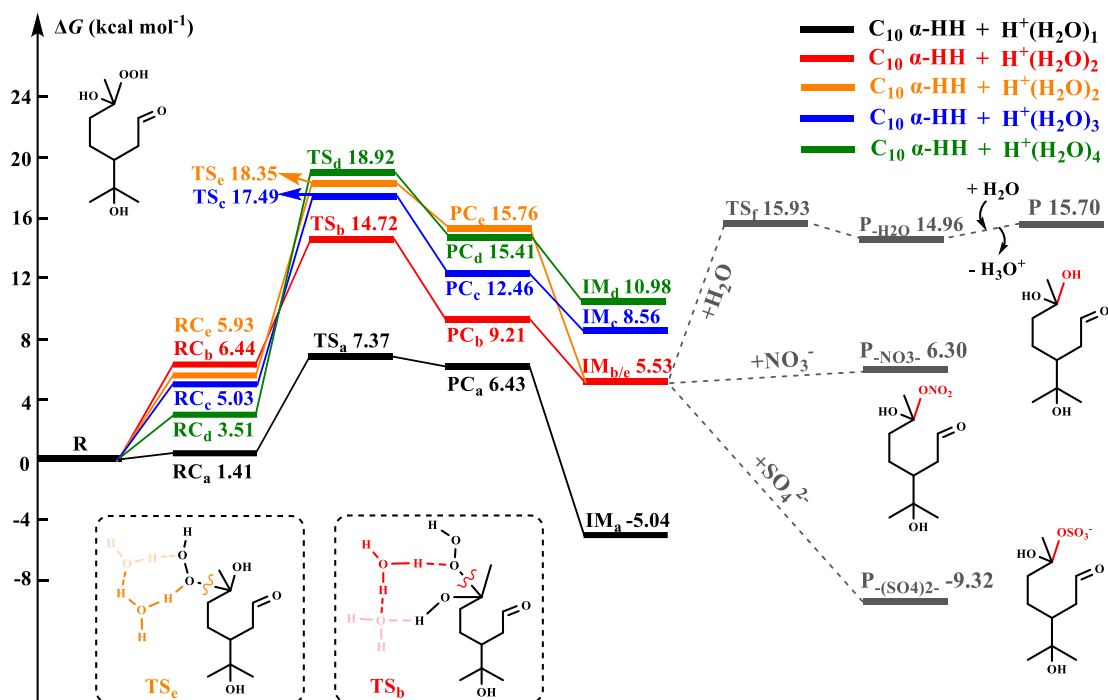

**Figure S6.** Calculated free-energy surfaces for acid-catalyzed hydrolysis of  $\text{C}_{10} \alpha\text{-HH}$  in four different cases at the SMD/M06-2X/6-311++G(3df,2pd)//M06-2X/6-31+G(d,p) level. The free energies of ROOH and  $\text{H}^+(\text{H}_2\text{O})_n$  ( $n = 1, 2, 3, 4$ ) are set to zero (reference state, R). RC,  $\text{TS}_x$  ( $x = a, b, c, d, e, f$ ), PC, IM and P represent pre-reactive complexes, transition states, post-reactive complexes, intermediates and products, respectively.

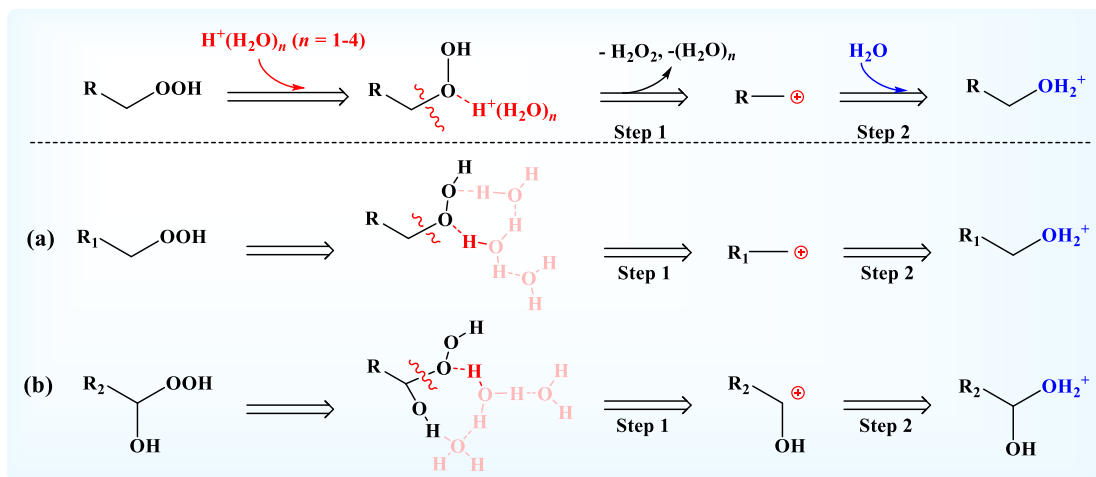

**Figure S7.** Two-step acid-catalyzed hydrolysis pathway of four ROOHs for screening protonated water cluster model. The reaction pathways **(a)** for C<sub>13</sub> α-AH, C<sub>12</sub> α-AH<sub>(1)</sub>, and C<sub>12</sub> α-AH<sub>(2)</sub>, and **(b)** for C<sub>10</sub> α-HH.

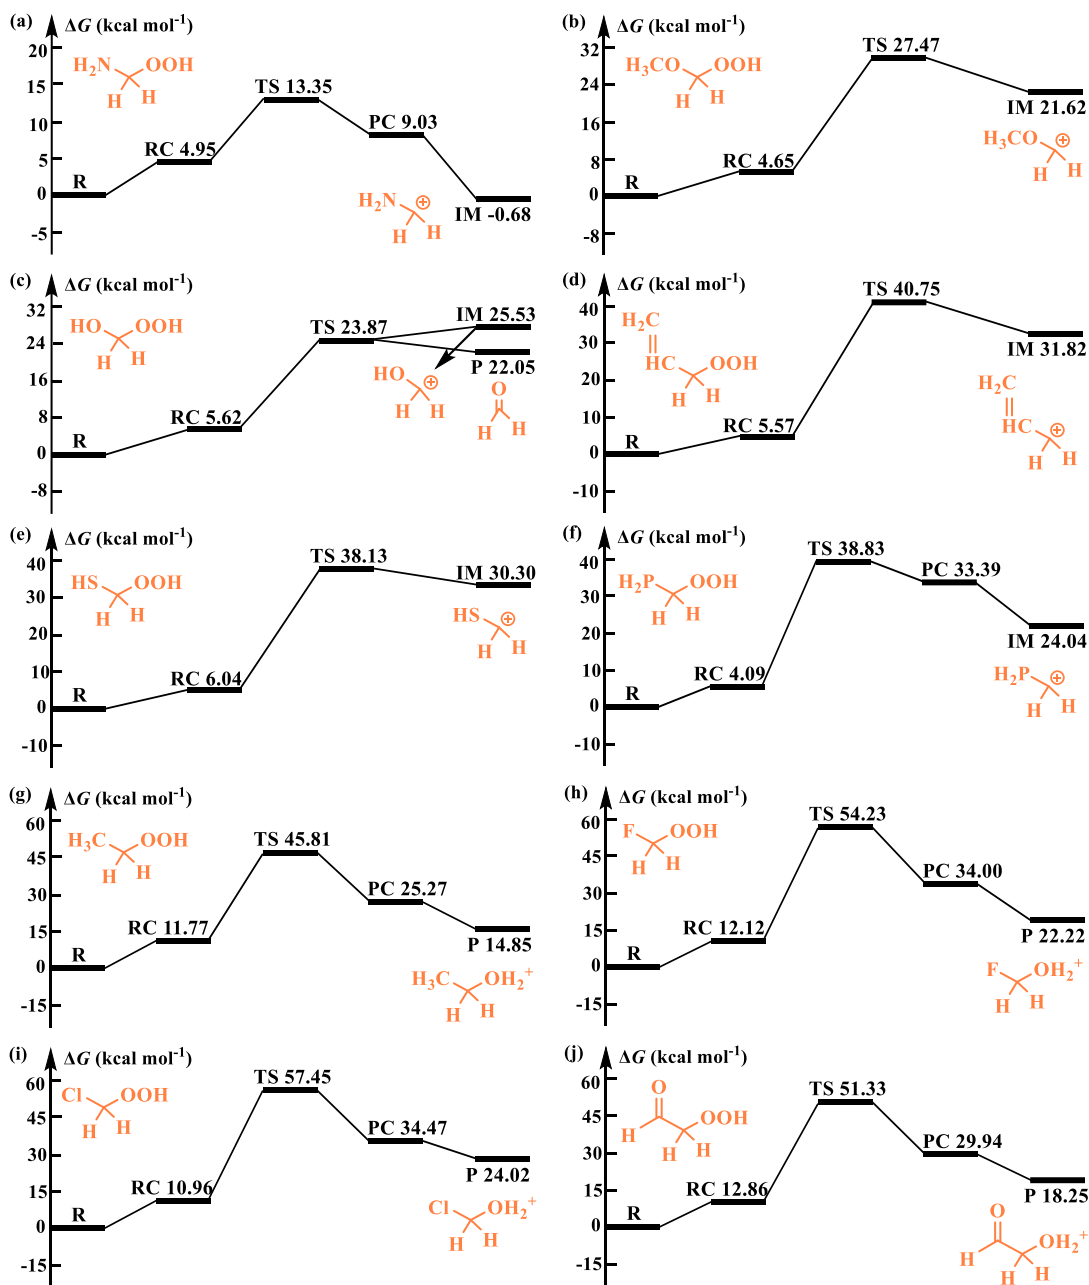

**Figure S8.** Calculated free-energy surfaces for acid-catalyzed hydrolysis of  $\text{CH}_3\text{CH}_2\text{OOH}$  and  $\text{CH}_2(\text{X})\text{OOH}$  ( $\text{X} = \text{NH}_2, \text{OCH}_3, \text{OH}, \text{CH}=\text{CH}_2, \text{SH}, \text{PH}_2, \text{F}, \text{Cl}$  and  $\text{CHO}$ ) at the SMD/M06-2X/6-311++G(3df,2pd)//M06-2X/6-31+G(d,p) level. The free energies of  $\text{ROOH}$  and  $\text{H}^+(\text{H}_2\text{O})_2$  are set to zero (reference state, R). RC, TS, PC, IM and P represent pre-reactive complexes, transition states, post-reactive complexes, intermediates and products, respectively.



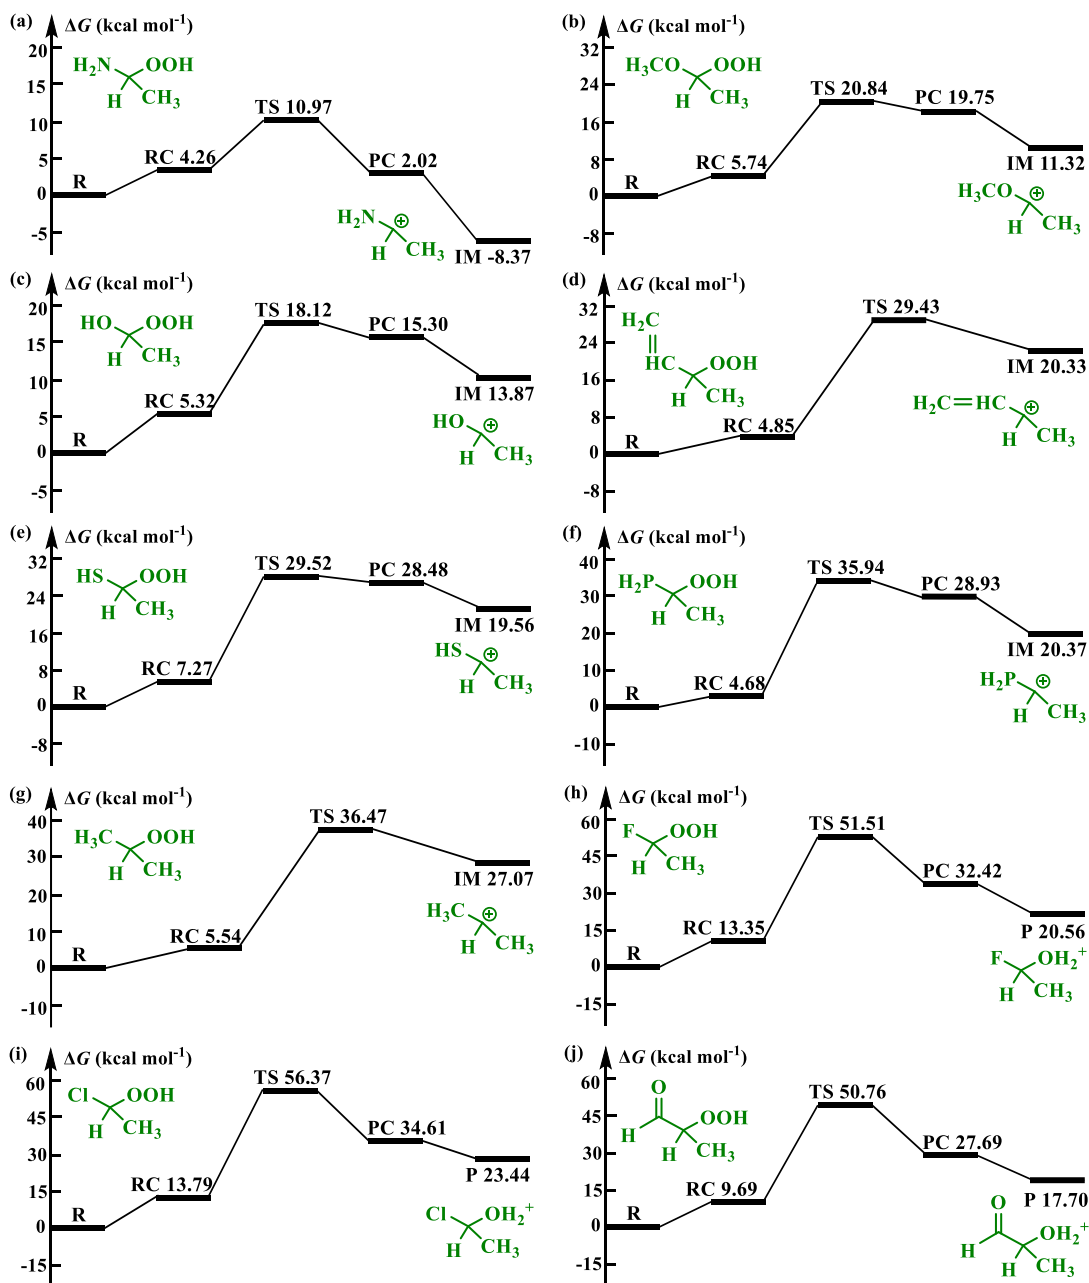

**Figure S9.** Calculated free-energy surfaces for acid-catalyzed hydrolysis of  $\text{CH}(\text{CH}_3)_2\text{OOH}$  and  $\text{CH}(\text{CH}_3)(\text{X})\text{OOH}$  ( $\text{X} = \text{NH}_2, \text{OCH}_3, \text{OH}, \text{CH}=\text{CH}_2, \text{SH}, \text{PH}_2, \text{F}, \text{Cl}$  and  $\text{CHO}$ ) at the SMD/M06-2X/6-311++G(3df,2pd)//M06-2X/6-31+G(d,p) level. The free energies of  $\text{ROOH}$  and  $\text{H}^+(\text{H}_2\text{O})_2$  are set to zero (reference state, R). RC, TS, PC, IM and P represent pre-reactive complexes, transition states, post-reactive complexes, intermediates and products, respectively.

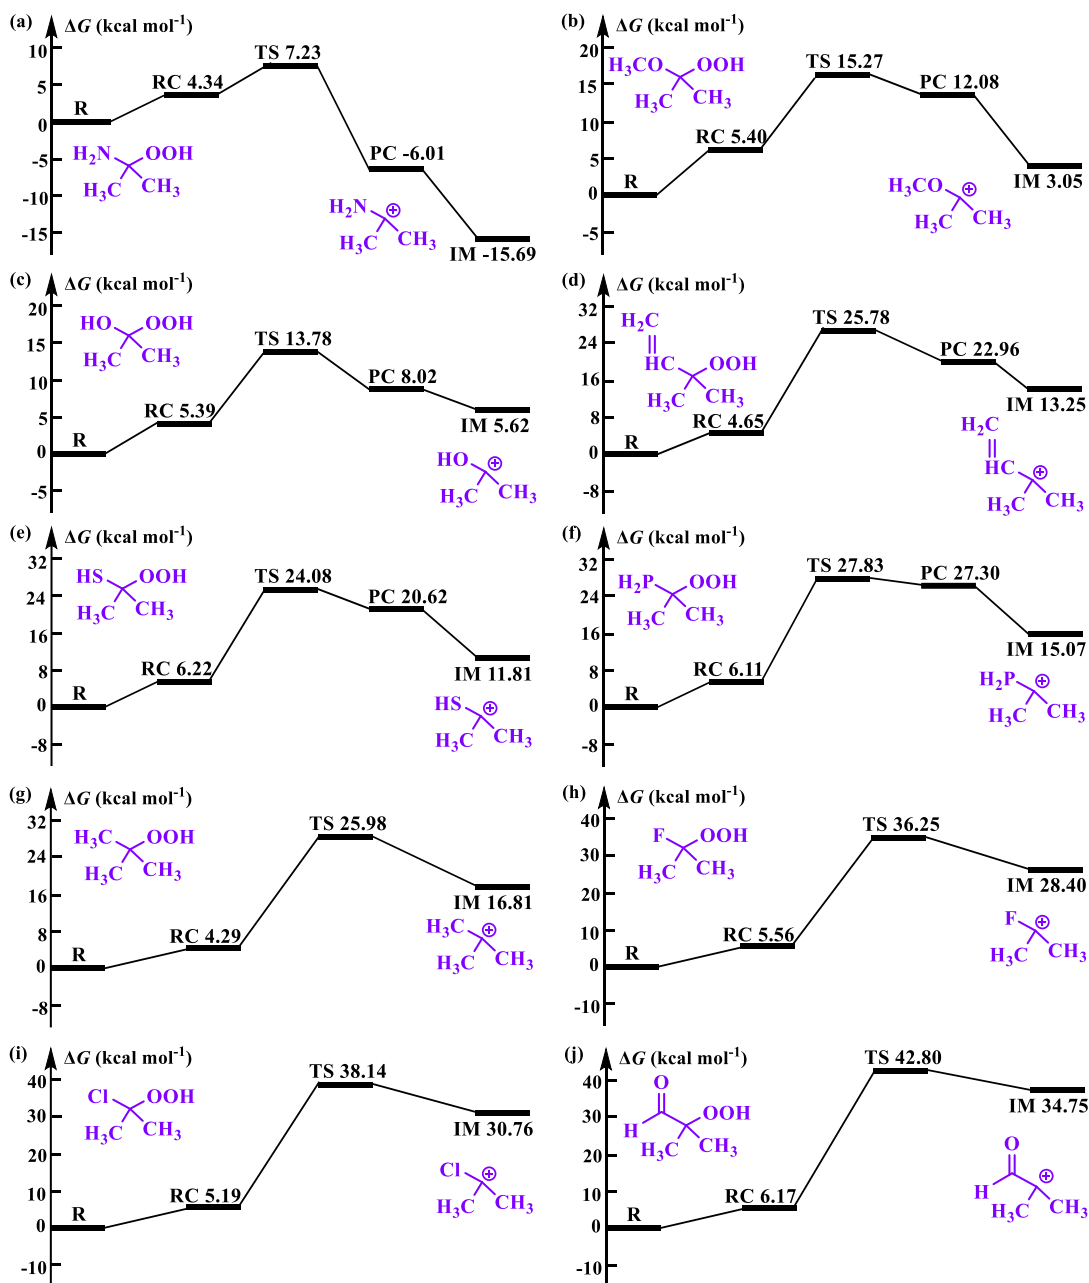

**Figure S10.** Calculated free-energy surfaces for acid-catalyzed hydrolysis of  $\text{C}(\text{CH}_3)_3\text{OOH}$  and  $\text{C}(\text{CH}_3)_2(\text{X})\text{OOH}$  ( $\text{X} = \text{NH}_2, \text{OCH}_3, \text{OH}, \text{CH}=\text{CH}_2, \text{SH}, \text{PH}_2, \text{F}, \text{Cl}$  and  $\text{CHO}$ ) at the SMD/M06-2X/6-311++G(3df,2pd)//M06-2X/6-31+G(d,p) level. The free energies of ROOH and  $\text{H}^+(\text{H}_2\text{O})_2$  are set to zero (reference state, R). RC, TS, PC and IM represent pre-reactive complexes, transition states, post-reactive complexes and intermediates, respectively.

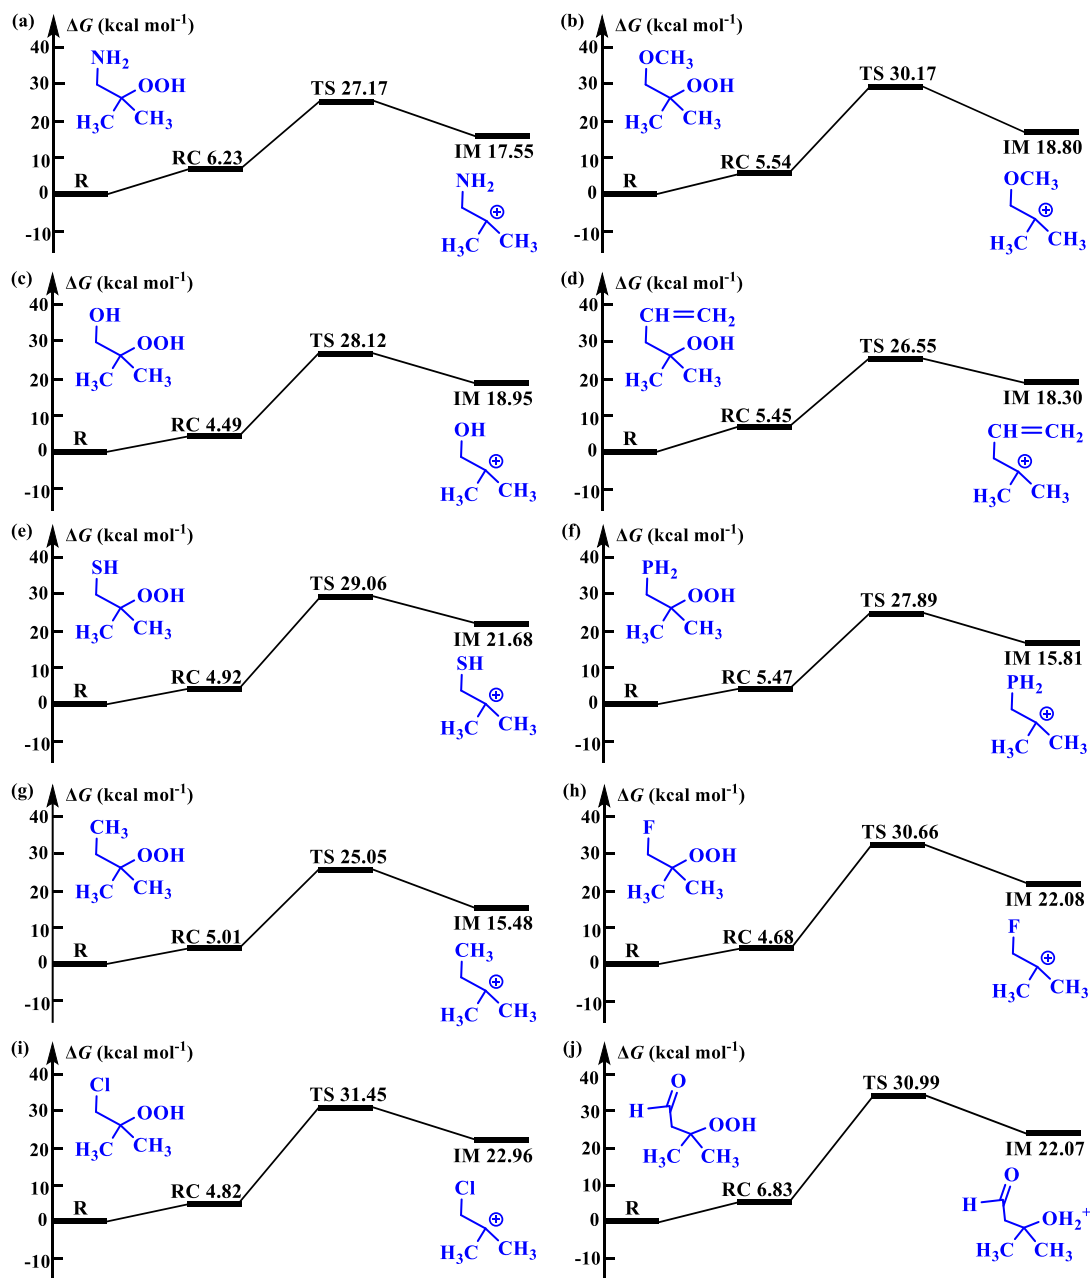

**Figure S11.** Calculated free-energy surfaces for acid-catalyzed hydrolysis of  $\text{C}(\text{CH}_3)_2(\text{CH}_2\text{X})\text{OOH}$  and  $\text{C}(\text{CH}_3)_2(\text{CH}_2(\text{X}))\text{OOH}$  ( $\text{X} = \text{NH}_2, \text{OCH}_3, \text{OH}, \text{CH}=\text{CH}_2, \text{SH}, \text{PH}_2, \text{F}, \text{Cl}$  and  $\text{CHO}$ ) at the SMD/M06-2X/6-311++G(3df,2pd)//M06-2X/6-31+G(d,p) level. The free energies of ROOH and  $\text{H}^+(\text{H}_2\text{O})_2$  are set to zero (reference state, R). RC, TS and IM represent pre-reactive complexes, transition states and intermediates, respectively.

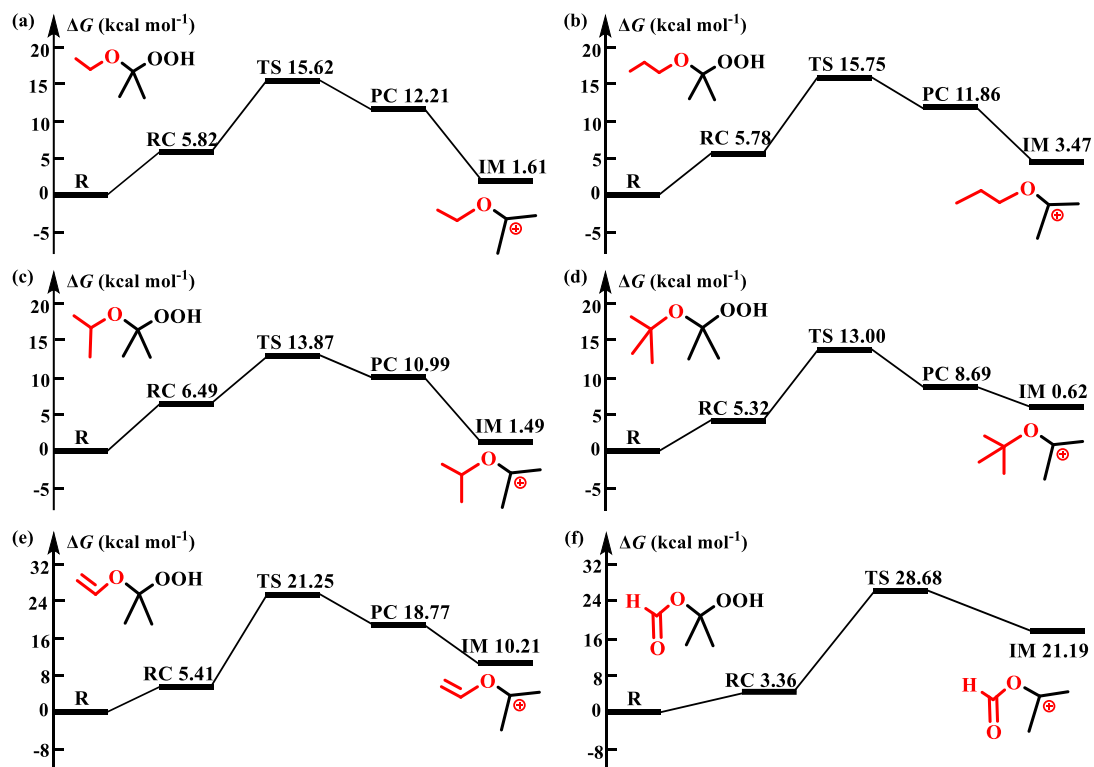

**Figure S12.** Calculated free-energy surfaces for acid-catalyzed hydrolysis of  $\text{C}(\text{CH}_3)_2(\text{OY})\text{OOH}$  ( $\text{Y} = \text{CH}_2\text{CH}_3$ ,  $\text{CH}_2\text{CH}_2\text{CH}_3$ ,  $\text{CH}(\text{CH}_3)_2$ ,  $\text{C}(\text{CH}_3)_3$ ,  $\text{CH}=\text{CH}_2$ , and  $\text{CHO}$ ) at the SMD/M06-2X/6-311++G(3df,2pd)//M06-2X/6-31+G(d,p) level. The free energies of ROOH and  $\text{H}^+(\text{H}_2\text{O})_2$  are set to zero (reference state, R). RC, TS, PC and IM represent pre-reactive complexes, transition states, post-reactive complexes and intermediates, respectively.

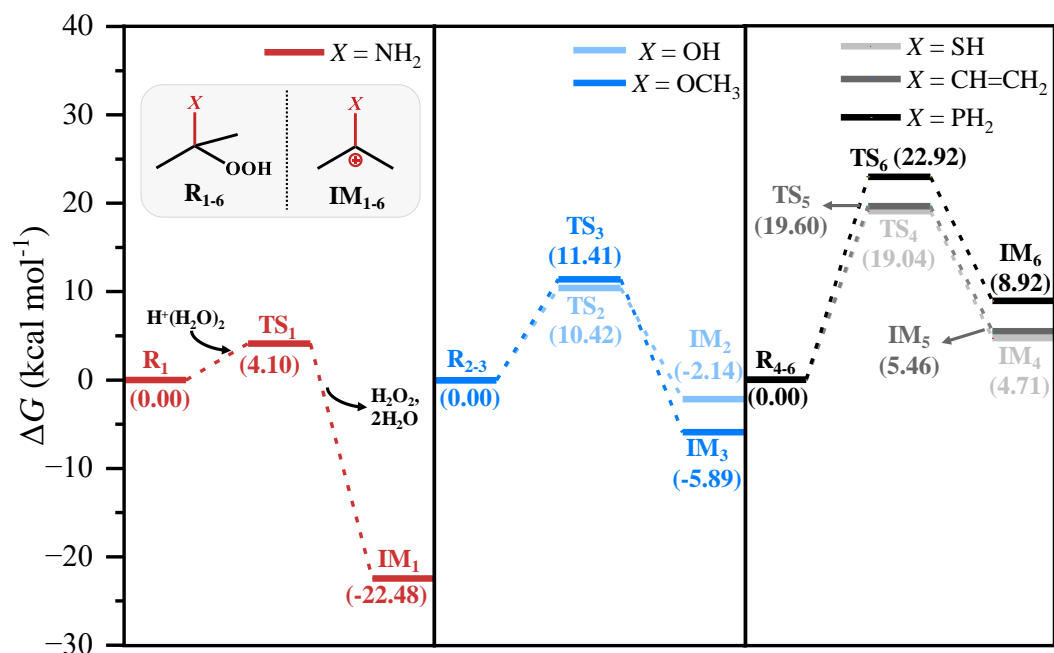

**Figure S13.** Calculated free-energy surfaces for carbocation formation during the acid-catalyzed hydrolysis of  $C(CH_3)_2(X)OOH$ , where  $X = NH_2, OH, OCH_3, CH=CH_2, SH, \text{ or } PH_2$ . Free energies are computed at  $\omega B97X-D/6-311++G(3df,2pd)/\omega B97X-D/6-31+G(d,p)$  levels with the SMD solvation model, with  $ROOH$  and  $H^+(H_2O)_2$  set as the reference state at  $0 \text{ kcal mol}^{-1}$ . Transition states (TS) and intermediates (IM) are labelled.

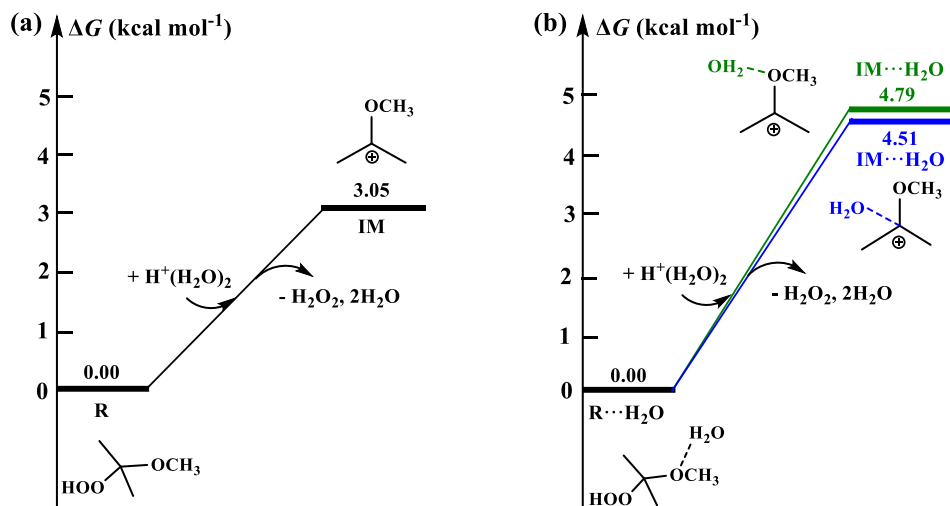

**Figure S14.** Changes in reaction energetics for carbocation intermediate formation during acid-catalyzed hydrolysis of  $C(CH_3)_2(OCH_3)OOH$  under (a) implicit solvation only vs. (b) explicit monohydration. Free energies ( $G$ ) computed at SMD/M06-2X/6-311++G(3df,2pd)//M06-2X/6-31+G(d,p) level. R and IM denote the reactant and carbocation, while  $R \cdots H_2O$  and  $IM \cdots H_2O$  are their monohydrated forms.

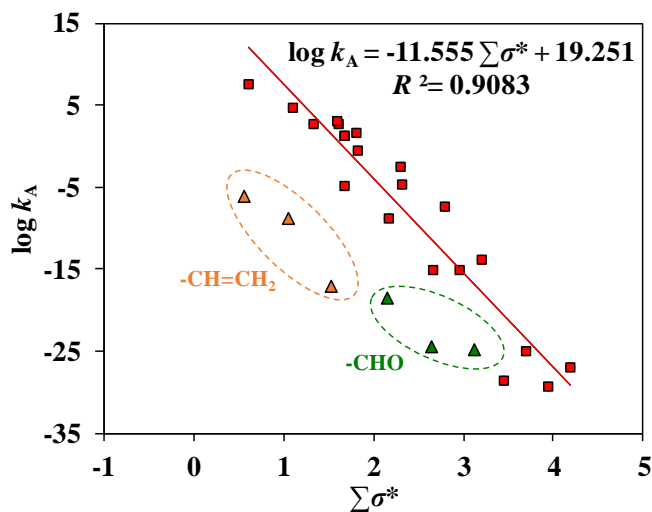

**Figure S15.** Correlations between the logarithms of the acid-catalyzed hydrolysis second-order rate constants ( $\log k_A$ ) and the sum of Taft constants ( $\Sigma\sigma^*$ ) of the selected  $\alpha$ -substituted ROOH model compounds, including  $\text{CH}_2(\text{X})\text{OOH}$ ,  $\text{CH}(\text{CH}_3)(\text{X})\text{OOH}$ ,  $\text{C}(\text{CH}_3)_2(\text{X})\text{OOH}$ , and  $\text{C}(\text{CH}_3)_2(\text{OY})\text{OOH}$ , where  $\text{X} = -\text{NH}_2$ ,  $-\text{OH}$ ,  $-\text{OCH}_3$ ,  $-\text{CH}=\text{CH}_2$ ,  $-\text{SH}$ ,  $-\text{PH}_2$ ,  $-\text{F}$ ,  $-\text{Cl}$ ,  $-\text{CHO}$ , and  $\text{Y} = -\text{CH}_2\text{CH}_3$ ,  $-\text{CH}_2\text{CH}_2\text{CH}_3$ ,  $-\text{CH}(\text{CH}_3)_2$ ,  $-\text{C}(\text{CH}_3)_3$ ,  $-\text{CH}=\text{CH}_2$ ,  $-\text{CHO}$ .

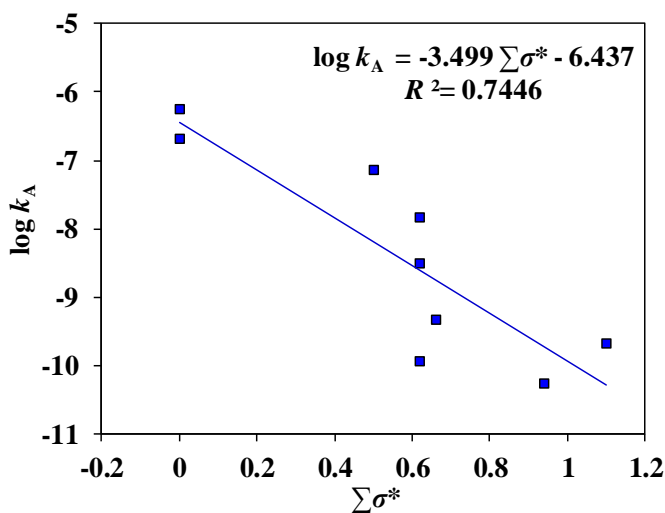

**Figure S16.** Correlations between the logarithms of the acid-catalyzed hydrolysis second-order rate constants ( $\log k_A$ ) and the sum of Taft constants ( $\Sigma\sigma^*$ ) for  $\text{C}(\text{CH}_3)_3\text{OOH}$  and  $\beta$ -substituted  $\text{C}(\text{CH}_3)_2(\text{CH}_2(\text{X}))\text{OOH}$ , where  $\text{X} = -\text{NH}_2$ ,  $-\text{OH}$ ,  $-\text{OCH}_3$ ,  $-\text{CH}=\text{CH}_2$ ,  $-\text{SH}$ ,  $-\text{PH}_2$ ,  $-\text{F}$ ,  $-\text{Cl}$ ,  $-\text{CHO}$ .

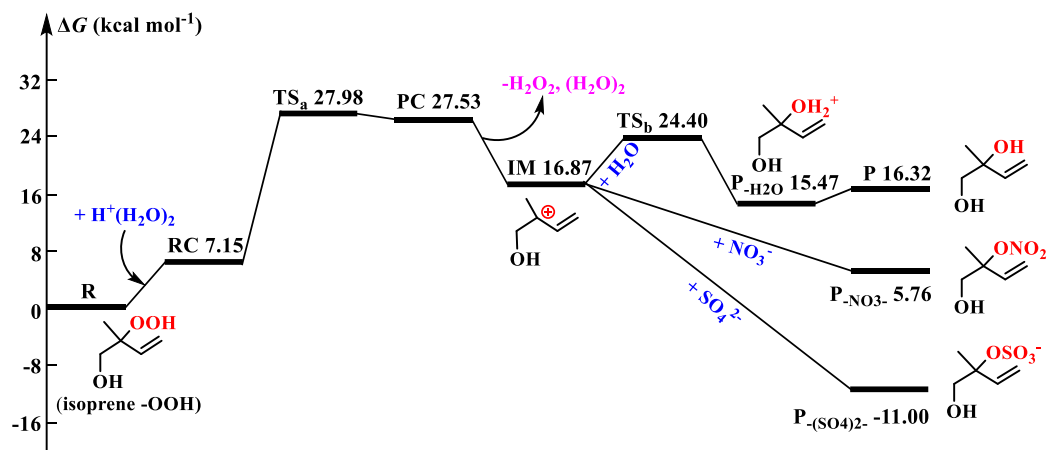

**Figure S17.** Calculated free-energy surfaces for acid-catalyzed hydrolysis of isoprene-OOH at the SMD/M06-2X/6-311++G(3df,2pd)//M06-2X/6-31+G(d,p) level. The free energies of ROOH and  $\text{H}^+(\text{H}_2\text{O})_2$  are set to zero (reference state). RC,  $\text{TS}_x$  ( $x = \text{a}, \text{b}$ ), PC, IM and P represent pre-reactive complexes, transition states, post-reactive complexes, intermediates and products, respectively.



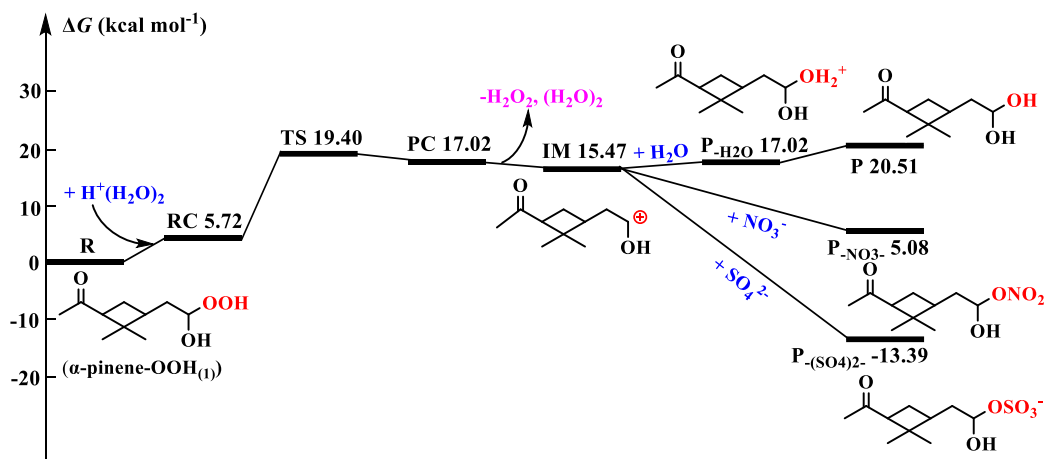

**Figure S18.** Calculated free-energy surfaces for acid-catalyzed hydrolysis of  $\alpha$ -pinene-OOH<sub>(1)</sub> at the SMD/M06-2X/6-311++G(3df,2pd)//M06-2X/6-31+G(d,p) level. The free energies of ROOH and H<sup>+</sup>(H<sub>2</sub>O)<sub>2</sub> are set to zero (reference state). RC, TS, PC, IM and P represent pre-reactive complexes, transition states, post-reactive complexes, intermediates and products, respectively.

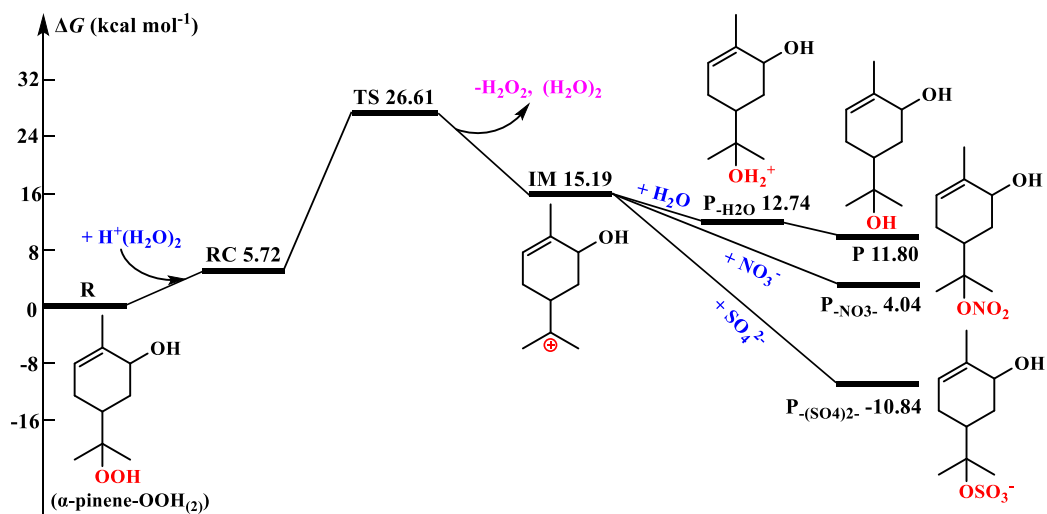

**Figure S19.** Calculated free-energy surfaces for acid-catalyzed hydrolysis of  $\alpha$ -pinene-OOH<sub>(2)</sub> at the SMD/M06-2X/6-311++G(3df,2pd)//M06-2X/6-31+G(d,p) level. The free energies of ROOH and H<sup>+</sup>(H<sub>2</sub>O)<sub>2</sub> are set to zero (reference state). RC, TS, IM and P represent pre-reactive complexes, transition states, intermediates and products, respectively.

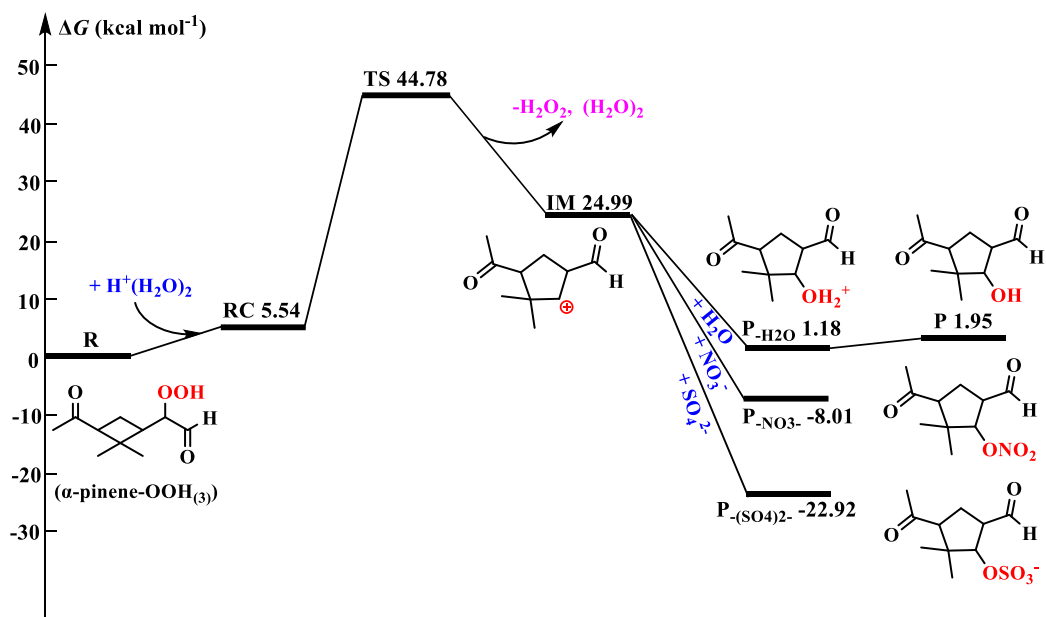

**Figure S20.** Calculated free-energy surfaces for acid-catalyzed hydrolysis of  $\alpha$ -pinene-OOH<sub>(3)</sub> at the SMD/M06-2X/6-311++G(3df,2pd)//M06-2X/6-31+G(d,p) level. The free energies of ROOH and H<sup>+</sup>(H<sub>2</sub>O)<sub>2</sub> are set to zero (reference state). RC, TS, IM and P represent pre-reactive complexes, transition states, intermediates and products, respectively.

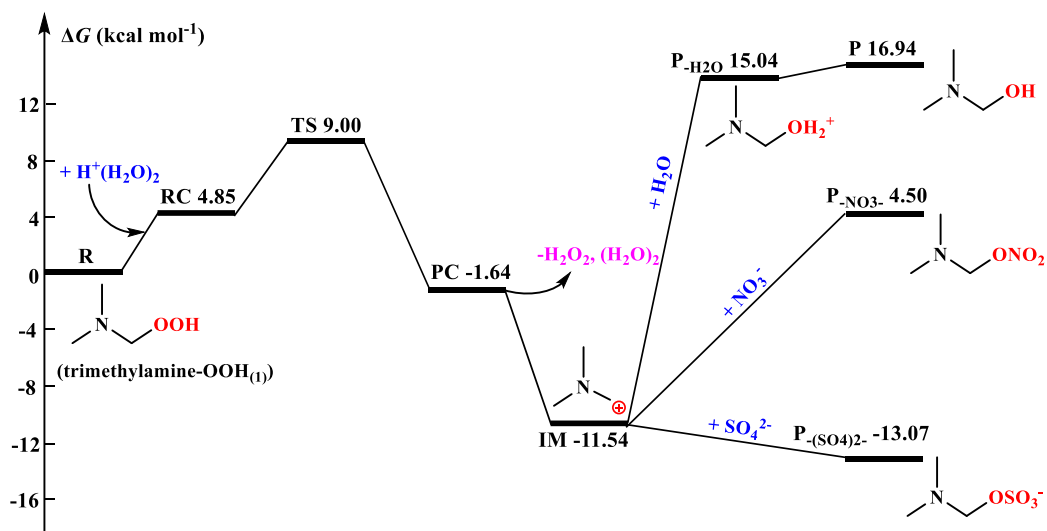

**Figure S21.** Calculated free-energy surfaces for acid-catalyzed hydrolysis of trimethylamine-OOH<sub>(1)</sub> at the SMD/M06-2X/6-311++G(3df,2pd)//M06-2X/6-31+G(d,p) level. The free energies of ROOH and H<sup>+</sup>(H<sub>2</sub>O)<sub>2</sub> are set to zero (reference state). RC, TS, PC, IM and P represent pre-reactive complexes, transition states, post-reactive complexes, intermediates and products, respectively.

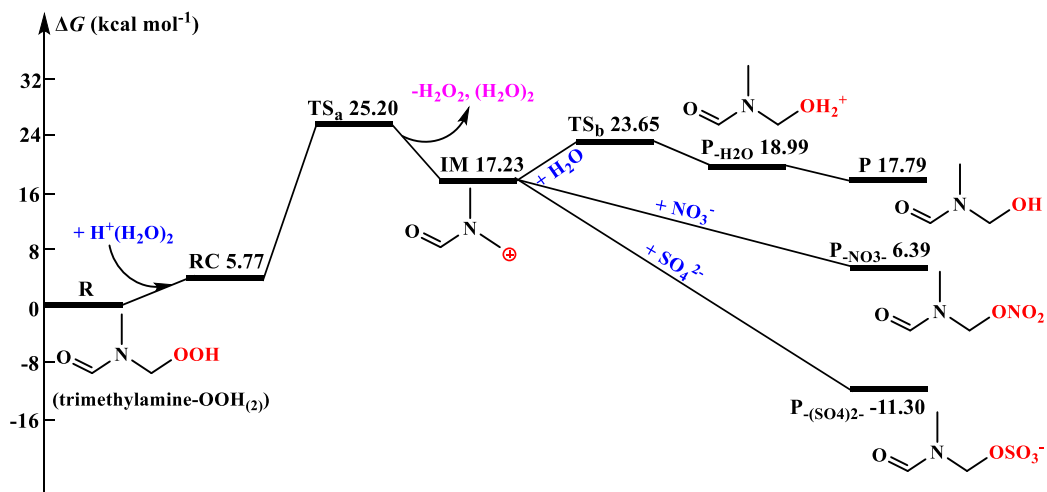

**Figure S22.** Calculated free-energy surfaces for acid-catalyzed hydrolysis of trimethylamine-OOH<sub>(2)</sub> at the SMD/M06-2X/6-311++G(3df,2pd)//M06-2X/6-31+G(d,p) level. The free energies of ROOH and H<sup>+</sup>(H<sub>2</sub>O)<sub>2</sub> are set to zero (reference state). RC, TS<sub>x</sub> ( $x = a, b$ ), IM and P represent pre-reactive complexes, transition states, intermediates and products, respectively.

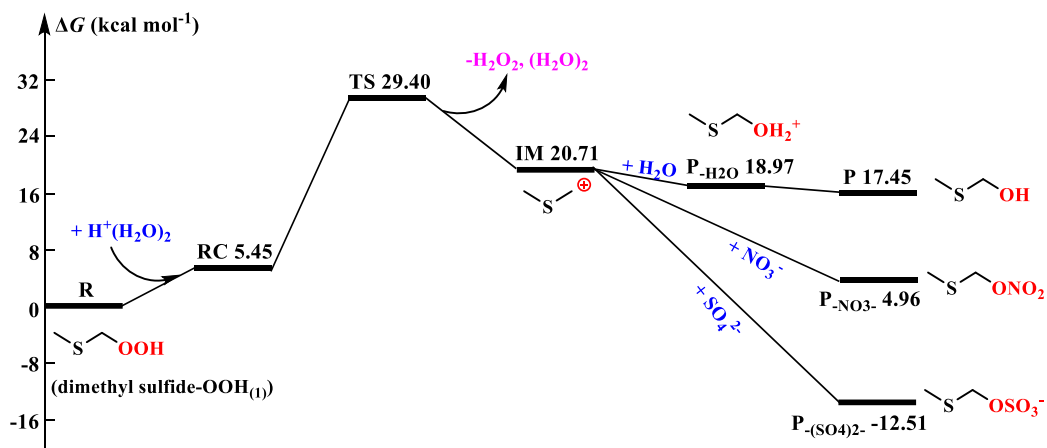

**Figure S23.** Calculated free-energy surfaces for acid-catalyzed hydrolysis of dimethyl sulfide-OOH<sub>(1)</sub> at the SMD/M06-2X/6-311++G(3df,2pd)//M06-2X/6-31+G(d,p) level. The free energies of ROOH and H<sup>+</sup>(H<sub>2</sub>O)<sub>2</sub> are set to zero (reference state). RC, TS, IM and P represent pre-reactive complexes, transition states, intermediates and products, respectively.

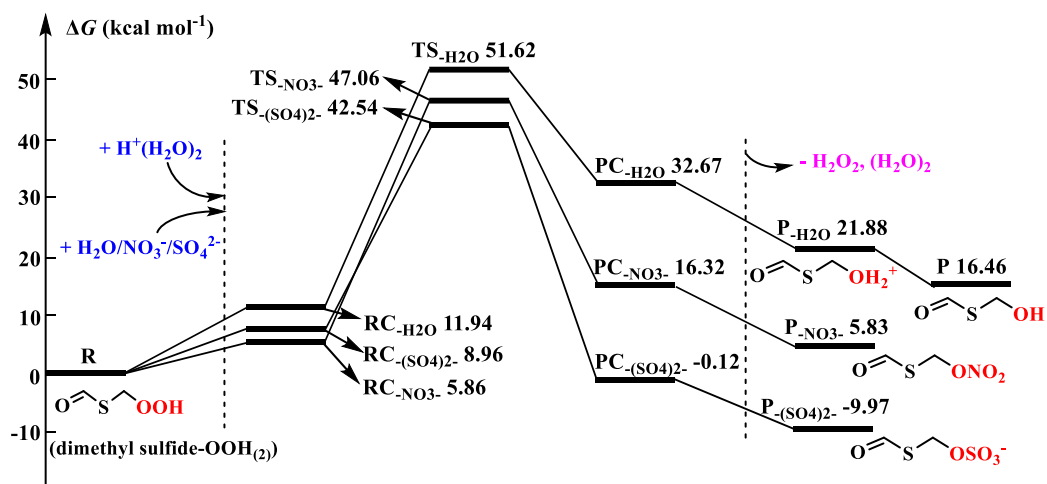

**Figure S24.** Calculated free-energy surfaces for acid-catalyzed hydrolysis of dimethyl sulfide-OOH<sub>(2)</sub> at the SMD/M06-2X/6-311++G(3df,2pd)//M06-2X/6-31+G(d,p) level. The free energies of ROOH, H<sup>+</sup>(H<sub>2</sub>O)<sub>2</sub>, and H<sub>2</sub>O/NO<sub>3</sub><sup>-</sup>/SO<sub>4</sub><sup>2-</sup> are set to zero (reference state). RC, TS, PC and P represent pre-reactive complexes, transition states, post-reactive complexes and products, respectively.

**Table S1.** Taft ( $\sigma^*$ ) constants of different substituents (Perrin et al., 1981).

| Substituents                                      | $\sigma^*$ | Substituents                        | $\sigma^*$ |
|---------------------------------------------------|------------|-------------------------------------|------------|
| -H                                                | 0.49       | -CH <sub>3</sub>                    | 0.00       |
| -NH <sub>2</sub>                                  | 0.62       | -CH <sub>2</sub> NH <sub>2</sub>    | 0.50       |
| -N(CH <sub>3</sub> ) <sub>2</sub>                 | 0.32       | -CH <sub>2</sub> OH                 | 0.62       |
| -OH                                               | 1.34       | -CH <sub>2</sub> OCH <sub>3</sub>   | 0.66       |
| -OCH <sub>3</sub>                                 | 1.81       | -CH <sub>2</sub> SH                 | 0.62       |
| -OCH <sub>2</sub> CH <sub>3</sub>                 | 1.68       | -CH <sub>2</sub> PH <sub>2</sub>    | —          |
| -OCH <sub>2</sub> CH <sub>2</sub> CH <sub>3</sub> | 1.68       | -CH <sub>2</sub> CH=CH <sub>2</sub> | 0.00       |
| -OCH(CH <sub>3</sub> ) <sub>2</sub>               | 1.62       | -CH <sub>2</sub> F                  | 1.10       |
| -OC(CH <sub>3</sub> ) <sub>3</sub>                | —          | -CH <sub>2</sub> Cl                 | 0.94       |
| -OCH=CH <sub>2</sub>                              | —          | -CH <sub>2</sub> CHO                | 0.62       |
| -OCHO                                             | —          |                                     |            |
| -SH                                               | 1.68       |                                     |            |
| -SCH <sub>3</sub>                                 | 1.56       |                                     |            |
| -PH <sub>2</sub>                                  | —          |                                     |            |
| -CH=CH <sub>2</sub>                               | 0.56       |                                     |            |
| -F                                                | 3.21       |                                     |            |
| -Cl                                               | 2.96       |                                     |            |
| -CHO                                              | 2.15       |                                     |            |

**Table S2.** Sum of Taft  $\sigma^*$  constants ( $\Sigma\sigma^*$ ) of the selected 45 ROOHs model compounds.

| Model compounds                            | X/Y                                             | $\Sigma\sigma^*$ | Model compounds                                           | X/Y                | $\Sigma\sigma^*$ |
|--------------------------------------------|-------------------------------------------------|------------------|-----------------------------------------------------------|--------------------|------------------|
| CH <sub>3</sub> CH <sub>2</sub> OOH        | —                                               | 0.00             | CH(CH <sub>3</sub> ) <sub>2</sub> OOH                     | —                  | 0.49             |
| C(CH <sub>3</sub> ) <sub>3</sub> OOH       | —                                               | 0.98             |                                                           |                    |                  |
| CH <sub>2</sub> (X)OOH                     | NH <sub>2</sub>                                 | 1.60             | CH(CH <sub>3</sub> )(X)OOH                                | NH <sub>2</sub>    | 1.11             |
|                                            | OH                                              | 2.32             |                                                           | OH                 | 1.83             |
|                                            | OCH <sub>3</sub>                                | 2.79             |                                                           | OCH <sub>3</sub>   | 2.30             |
|                                            | SH                                              | 2.66             |                                                           | SH                 | 2.17             |
|                                            | CH=CH <sub>2</sub>                              | 1.54             |                                                           | CH=CH <sub>2</sub> | 1.05             |
|                                            | PH <sub>2</sub>                                 | —                |                                                           | PH <sub>2</sub>    | —                |
|                                            | F                                               | 4.19             |                                                           | F                  | 3.70             |
|                                            | Cl                                              | 3.94             |                                                           | Cl                 | 3.45             |
|                                            | CHO                                             | 3.13             |                                                           | CHO                | 2.64             |
| C(CH <sub>3</sub> ) <sub>2</sub> (X)OOH    | NH <sub>2</sub>                                 | 0.62             | C(CH <sub>3</sub> ) <sub>2</sub> (CH <sub>2</sub> (X))OOH | NH <sub>2</sub>    | 0.50             |
|                                            | OH                                              | 1.34             |                                                           | OH                 | 0.62             |
|                                            | OCH <sub>3</sub>                                | 1.81             |                                                           | OCH <sub>3</sub>   | 0.66             |
|                                            | SH                                              | 1.68             |                                                           | SH                 | 0.62             |
|                                            | CH=CH <sub>2</sub>                              | 0.56             |                                                           | CH=CH <sub>2</sub> | 0.00             |
|                                            | PH <sub>2</sub>                                 | —                |                                                           | PH <sub>2</sub>    | —                |
|                                            | F                                               | 3.21             |                                                           | F                  | 1.10             |
|                                            | Cl                                              | 2.96             |                                                           | Cl                 | 0.94             |
|                                            | CHO                                             | 2.15             |                                                           | CHO                | 0.62             |
| C(CH <sub>3</sub> ) <sub>2</sub> (O(Y))OOH | CH <sub>2</sub> CH <sub>3</sub>                 | 1.68             |                                                           |                    |                  |
|                                            | CH <sub>2</sub> CH <sub>3</sub> CH <sub>3</sub> | 1.68             |                                                           |                    |                  |
|                                            | CH(CH <sub>3</sub> ) <sub>2</sub>               | 1.62             |                                                           |                    |                  |
|                                            | C(CH <sub>3</sub> ) <sub>3</sub>                | —                |                                                           |                    |                  |
|                                            | CH=CH <sub>2</sub>                              | —                |                                                           |                    |                  |
|                                            | CHO                                             | —                |                                                           |                    |                  |

**Table S3.** Calculated acid-catalyzed hydrolysis second-order rate constants ( $k_A$ ) and the corresponding lifetimes ( $\tau_{1/e}$ ) of selected 45 ROOHs model compounds under two selected scenarios (Inland regions, China (pH 3.8) and Southeastern United States (pH 0.9)).

| Model compounds                         | X/Y                | $k_A$ (L mol <sup>-1</sup> s <sup>-1</sup> ) | $\tau_{1/e}$ , pH 3.8  | $\tau_{1/e}$ , pH 0.9  |
|-----------------------------------------|--------------------|----------------------------------------------|------------------------|------------------------|
| CH <sub>3</sub> CH <sub>2</sub> OOH     | —                  | $1.58 \times 10^{-21}$                       | $4.6 \times 10^{19}$ d | $5.8 \times 10^{16}$ d |
| CH(CH <sub>3</sub> ) <sub>2</sub> OOH   | —                  | $1.12 \times 10^{-14}$                       | $6.5 \times 10^{12}$ d | $8.2 \times 10^9$ d    |
| C(CH <sub>3</sub> ) <sub>3</sub> OOH    | —                  | $5.50 \times 10^{-7}$                        | $1.3 \times 10^5$ d    | $1.7 \times 10^2$ d    |
| CH <sub>2</sub> (X)OOH                  | NH <sub>2</sub>    | $1.01 \times 10^3$                           | 6.3 s                  | < 1 s                  |
|                                         | OH                 | $1.94 \times 10^{-5}$                        | $3.8 \times 10^3$ d    | 4.7 d                  |
|                                         | OCH <sub>3</sub>   | $4.45 \times 10^{-8}$                        | $1.6 \times 10^6$ d    | $2.1 \times 10^3$ d    |
|                                         | SH                 | $6.77 \times 10^{-16}$                       | $1.1 \times 10^{14}$ d | $1.4 \times 10^{11}$ d |
|                                         | CH=CH <sub>2</sub> | $8.11 \times 10^{-18}$                       | $9.0 \times 10^{15}$ d | $1.1 \times 10^{13}$ d |
|                                         | PH <sub>2</sub>    | $2.08 \times 10^{-16}$                       | $3.5 \times 10^{14}$ d | $4.4 \times 10^{11}$ d |
|                                         | F                  | $1.07 \times 10^{-27}$                       | —                      | —                      |
|                                         | Cl                 | $4.63 \times 10^{-30}$                       | —                      | —                      |
|                                         | CHO                | $1.43 \times 10^{-25}$                       | —                      | —                      |
| CH(CH <sub>3</sub> )(X)OOH              | NH <sub>2</sub>    | $5.60 \times 10^4$                           | < 1 s                  | < 1 s                  |
|                                         | OH                 | $3.20 \times 10^{-1}$                        | 5.5 h                  | 24.8 s                 |
|                                         | OCH <sub>3</sub>   | $3.24 \times 10^{-3}$                        | 22.6 d                 | 40.9 min               |
|                                         | SH                 | $1.40 \times 10^{-9}$                        | $5.2 \times 10^7$ d    | $6.6 \times 10^4$ d    |
|                                         | CH=CH <sub>2</sub> | $1.62 \times 10^{-9}$                        | $4.5 \times 10^7$ d    | $5.7 \times 10^4$ d    |
|                                         | PH <sub>2</sub>    | $2.73 \times 10^{-14}$                       | $2.7 \times 10^{12}$ d | $3.4 \times 10^9$ d    |
|                                         | F                  | $1.05 \times 10^{-25}$                       | —                      | —                      |
|                                         | Cl                 | $2.88 \times 10^{-29}$                       | —                      | —                      |
|                                         | CHO                | $3.73 \times 10^{-25}$                       | —                      | —                      |
| C(CH <sub>3</sub> ) <sub>2</sub> (X)OOH | NH <sub>2</sub>    | $3.10 \times 10^7$                           | < 1 s                  | < 1 s                  |
|                                         | OH                 | $4.87 \times 10^2$                           | 13.0 s                 | < 1 s                  |
|                                         | OCH <sub>3</sub>   | $3.93 \times 10^1$                           | 2.7 min                | < 1 s                  |
|                                         | SH                 | $1.36 \times 10^{-5}$                        | $5.4 \times 10^3$ d    | 6.8 d                  |
|                                         | CH=CH <sub>2</sub> | $7.72 \times 10^{-7}$                        | $9.5 \times 10^4$ d    | $1.2 \times 10^2$ d    |
|                                         | PH <sub>2</sub>    | $2.42 \times 10^{-8}$                        | $3.0 \times 10^6$ d    | $3.8 \times 10^3$ d    |
|                                         | F                  | $1.62 \times 10^{-14}$                       | —                      | —                      |
|                                         | Cl                 | $6.65 \times 10^{-16}$                       | —                      | —                      |
|                                         | CHO                | $2.54 \times 10^{-19}$                       | —                      | —                      |

|                                                           |                                                 |                          |                         |                         |
|-----------------------------------------------------------|-------------------------------------------------|--------------------------|-------------------------|-------------------------|
| C(CH <sub>3</sub> ) <sub>2</sub> (CH <sub>2</sub> (X))OOH | NH <sub>2</sub>                                 | 7.38 × 10 <sup>-8</sup>  | —                       | —                       |
|                                                           | OH                                              | 1.49 × 10 <sup>-8</sup>  | —                       | —                       |
|                                                           | OCH <sub>3</sub>                                | 4.66 × 10 <sup>-10</sup> | —                       | —                       |
|                                                           | SH                                              | 3.03 × 10 <sup>-9</sup>  | —                       | —                       |
|                                                           | CH=CH <sub>2</sub>                              | 2.11 × 10 <sup>-7</sup>  | —                       | —                       |
|                                                           | PH <sub>2</sub>                                 | 2.19 × 10 <sup>-8</sup>  | —                       | —                       |
|                                                           | F                                               | 2.04 × 10 <sup>-10</sup> | —                       | —                       |
|                                                           | Cl                                              | 5.36 × 10 <sup>-11</sup> | —                       | —                       |
|                                                           | CHO                                             | 1.17 × 10 <sup>-10</sup> | —                       | —                       |
| C(CH <sub>3</sub> ) <sub>2</sub> (O(Y))OOH                | CH <sub>2</sub> CH <sub>3</sub>                 | 2.17 × 10 <sup>1</sup>   | 4.9 min                 | < 1 s                   |
|                                                           | CH <sub>2</sub> CH <sub>3</sub> CH <sub>3</sub> | 1.76 × 10 <sup>1</sup>   | 6.0 min                 | < 1 s                   |
|                                                           | CH(CH <sub>3</sub> ) <sub>2</sub>               | 4.16 × 10 <sup>2</sup>   | 15.2 s                  | < 1 s                   |
|                                                           | C(CH <sub>3</sub> ) <sub>3</sub>                | 1.81 × 10 <sup>3</sup>   | 3.5 s                   | < 1 s                   |
|                                                           | CH=CH <sub>2</sub>                              | 1.62 × 10 <sup>-3</sup>  | 45.1 d                  | 1.4 h                   |
|                                                           | CHO                                             | 5.80 × 10 <sup>-9</sup>  | 1.3 × 10 <sup>7</sup> d | 1.6 × 10 <sup>4</sup> d |



**Table S4.** Calculated acid-catalyzed hydrolysis second-order rate constants ( $k_A$ ) and the corresponding lifetimes ( $\tau_{1/e}$ ) of 8 atmospheric ROOHs under two selected scenarios (Inland regions, China (pH 3.8) and Southeastern United States (pH 0.9)).

| Compounds Name                      | $k_A$ (L mol <sup>-1</sup> s <sup>-1</sup> ) | $\tau_{1/e}$ , pH 3.8  | $\tau_{1/e}$ , pH 0.9  |
|-------------------------------------|----------------------------------------------|------------------------|------------------------|
| trimethylamine-OOH <sub>(1)</sub>   | $1.56 \times 10^6$                           | < 1 s                  | < 1 s                  |
| $\alpha$ -pinene-OOH <sub>(1)</sub> | $3.68 \times 10^{-2}$                        | 2 d                    | 3.6 min                |
| trimethylamine-OOH <sub>(2)</sub>   | $2.05 \times 10^{-6}$                        | $3.6 \times 10^4$ d    | 45 d                   |
| $\alpha$ -pinene-OOH <sub>(2)</sub> | $1.90 \times 10^{-7}$                        | $3.8 \times 10^5$ d    | 484 d                  |
| isoprene-OOH                        | $1.88 \times 10^{-8}$                        | $3.9 \times 10^6$ d    | $4.9 \times 10^3$ d    |
| dimethyl sulfide-OOH <sub>(1)</sub> | $1.71 \times 10^{-9}$                        | $4.3 \times 10^7$ d    | $5.4 \times 10^4$ d    |
| $\alpha$ -pinene-OOH <sub>(3)</sub> | $8.99 \times 10^{-21}$                       | $8.1 \times 10^{18}$ d | $1.0 \times 10^{16}$ d |
| dimethyl sulfide-OOH <sub>(2)</sub> | $8.66 \times 10^{-26}$                       | $8.4 \times 10^{23}$ d | $1.0 \times 10^{21}$ d |

## References

- Enami, S.: Proton-catalyzed decomposition of multifunctionalized organic hydroperoxides derived from the reactions of criegee intermediates with ethylene glycol in aqueous organic media, ACS Earth Space Chem., 6, 1937-1947, 10.1021/acsearthspacechem.2c00142, 2022.
- Hu, M., Chen, K., Qiu, J., Lin, Y., Tonokura, K., and Enami, S.: Decomposition mechanism of  $\alpha$ -alkoxyalkyl-hydroperoxides in the liquid phase: temperature dependent kinetics and theoretical calculations, Environ Sci Atmos, 2, 241-251, 10.1039/d1ea00076d, 2022.
- Perrin, D. D., Dempsey, B., and Serjeant, E. P.: pKa prediction for organic acids and bases, Chapman and Hall: New York, 1981.
- Qiu, J., Tonokura, K., and Enami, S.: Proton-catalyzed decomposition of  $\alpha$ -hydroxyalkyl-hydroperoxides in water, Environ. Sci. Technol., 54, 10561-10569, 10.1021/acs.est.0c03438, 2020.
